# Supplementary material
Source: PubMed Central journal article supplement (PMC4825140)
Supplement: supp_pp.15.01283_PP2015-01283DR3_Supplemental_Material.pdf [file supp_pp.15.01283_PP2015-01283DR3_Supplemental_Material.pdf]

## 1 Up-regulation

| 2  | Gene ID          | Description                                                                   |
|----|------------------|-------------------------------------------------------------------------------|
| 3  | LOC_Os12g15680.1 | cDNA laccase precursor protein, putative, expressed                           |
| 4  | LOC_Os01g30956.1 | cDNA retrotransposon protein, putative, unclassified, expressed               |
| 5  | LOC_Os05g35070.1 | cDNA DUF630/DUF632 domains containing protein, putative, expressed            |
| 6  | LOC_Os03g52320.1 | cDNA GRF-interacting factor 1, putative, expressed                            |
| 7  | LOC_Os04g05650.1 | cDNA expressed protein                                                        |
| 8  | LOC_Os07g14514.1 | cDNA retrotransposon protein, putative, unclassified, expressed               |
| 9  | LOC_Os10g40490.1 | cDNA U-box domain containing protein, expressed                               |
| 10 | LOC_Os12g12730.1 | cDNA OsCML28 - Calmodulin-related calcium sensor protein, expressed           |
| 11 | LOC_Os12g28590.1 | cDNA ATPase 2, putative, expressed                                            |
| 12 | LOC_Os03g07010.1 | cDNA retrotransposon protein, putative, unclassified                          |
| 13 | LOC_Os03g45960.1 | cDNA thaumatin, putative, expressed                                           |
| 14 | LOC_Os04g01740.1 | cDNA heat shock protein, putative, expressed                                  |
| 15 | LOC_Os04g48490.1 | cDNA fasciclin-like arabinogalactan protein, putative, expressed              |
| 16 | LOC_Os07g02070.1 | cDNA retrotransposon protein, putative, Ty3-gypsy subclass                    |
| 17 | LOC_Os10g01350.1 | cDNA retrotransposon protein, putative, unclassified, expressed               |
| 18 | LOC_Os12g37690.1 | cDNA MYB family transcription factor, putative, expressed                     |
| 19 | LOC_Os02g50330.1 | cDNA RNA-dependent RNA polymerase, putative, expressed                        |
| 20 | LOC_Os01g42860.1 | cDNA inhibitor I family protein, putative, expressed                          |
| 21 | LOC_Os02g30910.1 | cDNA nodulin MtN3 family protein, putative, expressed                         |
| 22 | LOC_Os03g51350.1 | cDNA expressed protein                                                        |
| 23 | LOC_Os04g52310.1 | cDNA metal cation transporter, putative, expressed                            |
| 24 | LOC_Os04g59260.1 | cDNA peroxidase precursor, putative, expressed                                |
| 25 | LOC_Os06g19110.1 | cDNA cadmium tolerance factor, putative, expressed                            |
| 26 | LOC_Os07g27390.1 | cDNA retrotransposon protein, putative, unclassified, expressed               |
| 27 | LOC_Os09g01360.1 | cDNA expressed protein                                                        |
| 28 | LOC_Os11g42160.1 | cDNA F-box/LRR-repeat protein 3, putative, expressed                          |
| 29 | LOC_Os12g12850.2 | cDNA ATP-dependent Clp protease ATP-binding subunit clpA homolog, chloroplast |
| 30 |                  | precursor, putative, expressed                                                |
| 31 | LOC_Os12g26940.1 | cDNA CHASE domain containing protein, expressed                               |
| 32 | LOC_Os03g08320.1 | cDNA ZIM domain containing protein, putative, expressed                       |
| 33 | LOC_Os04g35130.1 | cDNA expressed protein                                                        |
| 34 | LOC_Os07g11739.1 | cDNA cytochrome P450, putative, expressed                                     |
| 35 | LOC_Os10g22630.1 | cDNA expressed protein                                                        |
| 36 | LOC_Os10g22630.2 | cDNA expressed protein                                                        |
| 37 | LOC_Os11g38580.1 | cDNA NBS-LRR type disease resistance protein, putative, expressed             |
| 38 | LOC_Os12g36830.1 | cDNA pathogenesis-related Bet v I family protein, putative, expressed         |
| 39 | LOC_Os01g39136.1 | cDNA retrotransposon protein, putative, unclassified, expressed               |
| 40 | LOC_Os01g65169.1 | cDNA proton-dependent oligopeptide transport, putative, expressed             |
| 41 | LOC_Os03g56580.1 | cDNA no apical meristem protein, putative, expressed                          |
| 42 | LOC_Os04g18140.1 | cDNA transposon protein, putative, Mutator sub-class, expressed               |
| 43 | LOC_Os04g58090.1 | cDNA harpin-induced protein 1 domain containing protein, expressed            |
| 44 | LOC_Os05g01330.1 | cDNA expressed protein                                                        |

|    |                  |                                                                                  |
|----|------------------|----------------------------------------------------------------------------------|
| 45 | LOC_Os05g13320.1 | cDNA C4-dicarboxylate transporter/malic acid transport protein, expressed        |
| 46 | LOC_Os05g16240.1 | cDNA expressed protein                                                           |
| 47 | LOC_Os06g45184.2 | cDNA retrotransposon protein, putative, Ty3-gypsy subclass, expressed            |
| 48 | LOC_Os07g17230.1 | cDNA WRKY123, expressed                                                          |
| 49 | LOC_Os07g35940.1 | cDNA beta-amylase, putative, expressed                                           |
| 50 | LOC_Os07g40300.1 | cDNA ZOS7-10 - C2H2 zinc finger protein, expressed                               |
| 51 | LOC_Os08g43620.1 | cDNA expressed protein                                                           |
| 52 | LOC_Os09g11160.1 | cDNA expressed protein                                                           |
| 53 | LOC_Os09g17560.1 | cDNA O-methyltransferase, putative, expressed                                    |
| 54 | LOC_Os10g11500.1 | cDNA SCP-like extracellular protein, expressed                                   |
| 55 | LOC_Os10g26340.1 | cDNA cytochrome P450, putative, expressed                                        |
| 56 | LOC_Os10g34930.1 | cDNA secretory protein, putative, expressed                                      |
| 57 | LOC_Os11g26570.1 | cDNA dehydrin, putative, expressed                                               |
| 58 | LOC_Os11g31420.1 | cDNA expressed protein                                                           |
| 59 | LOC_Os11g31705.1 | cDNA expressed protein                                                           |
| 60 | LOC_Os11g34970.1 | cDNA NB-ARC domain containing protein, expressed                                 |
| 61 | LOC_Os11g45990.1 | cDNA von Willebrand factor type A domain containing protein, putative, expressed |
| 62 | LOC_Os12g11370.1 | cDNA verticillium wilt disease resistance protein, putative, expressed           |
| 63 | LOC_Os12g12854.1 | cDNA expressed protein                                                           |
| 64 | LOC_Os12g40920.1 | cDNA bZIP transcription factor domain containing protein, expressed              |
| 65 | LOC_Os12g44110.2 | cDNA ligA, putative, expressed                                                   |
| 66 | LOC_Os01g15740.1 | cDNA expressed protein                                                           |
| 67 | LOC_Os04g37490.1 | cDNA oxidoreductase, aldo/keto reductase family protein, putative, expressed     |
| 68 | LOC_Os05g30700.1 | cDNA expressed protein                                                           |
| 69 | LOC_Os07g32680.1 | cDNA retrotransposon protein, putative, unclassified, expressed                  |
| 70 | LOC_Os07g33290.1 | cDNA hypothetical protein                                                        |
| 71 | LOC_Os08g35630.1 | cDNA MTD1, putative, expressed                                                   |
| 72 | LOC_Os08g39730.1 | cDNA cytochrome P450, putative, expressed                                        |
| 73 | LOC_Os12g07420.1 | cDNA transmembrane protein 17, putative, expressed                               |
| 74 | LOC_Os12g09190.1 | cDNA expressed protein                                                           |
| 75 | LOC_Os12g12010.1 | cDNA verticillium wilt disease resistance protein precursor, putative, expressed |
| 76 | LOC_Os12g28880.1 | cDNA LTPL110 - Protease inhibitor/seed storage/LTP family protein precursor,     |
| 77 |                  | putative, expressed                                                              |
| 78 | LOC_Os12g40920.3 | cDNA bZIP transcription factor domain containing protein, expressed              |
| 79 | LOC_Os01g03390.1 | cDNA BBTI7 - Bowman-Birk type bran trypsin inhibitor precursor, expressed        |
| 80 | LOC_Os01g06740.1 | cDNA ribosome inactivating protein, putative, expressed                          |
| 81 | LOC_Os01g28450.1 | cDNA SCP-like extracellular protein, expressed                                   |
| 82 | LOC_Os01g28744.1 | cDNA retrotransposon protein, putative, unclassified, expressed                  |
| 83 | LOC_Os01g47300.1 | cDNA retrotransposon protein, putative, unclassified, expressed                  |
| 84 | LOC_Os01g71624.5 | cDNA expressed protein                                                           |
| 85 | LOC_Os01g72530.1 | cDNA OsCML31 - Calmodulin-related calcium sensor protein, expressed              |
| 86 | LOC_Os02g04130.1 | cDNA DUF1645 domain containing protein, putative, expressed                      |
| 87 | LOC_Os02g17400.1 | cDNA leucine rich repeat protein, putative, expressed                            |
| 88 | LOC_Os02g29300.1 | cDNA expressed protein                                                           |

|     |                  |                                                                                   |
|-----|------------------|-----------------------------------------------------------------------------------|
| 89  | LOC_Os02g53690.1 | cDNA growth regulating factor protein, putative, expressed                        |
| 90  | LOC_Os02g57990.4 | cDNA methionine adenosyltransferase regulatory beta subunit-related, putative,    |
| 91  |                  | expressed                                                                         |
| 92  | LOC_Os03g23210.1 | cDNA retrotransposon protein, putative, unclassified, expressed                   |
| 93  | LOC_Os03g46060.1 | cDNA thaumatin family domain containing protein, expressed                        |
| 94  | LOC_Os03g46070.1 | cDNA thaumatin, putative, expressed                                               |
| 95  | LOC_Os04g03370.1 | cDNA cysteine-rich receptor-like protein kinase 41 precursor, putative, expressed |
| 96  | LOC_Os04g13160.1 | cDNA OsFBD9 - F-box and FBD domain containing protein, expressed                  |
| 97  | LOC_Os04g46970.1 | cDNA glucosyltransferase, putative, expressed                                     |
| 98  | LOC_Os04g54560.1 | cDNA transferase family protein, putative, expressed                              |
| 99  | LOC_Os05g11900.1 | cDNA expressed protein                                                            |
| 100 | LOC_Os05g49700.1 | cDNA AP2 domain containing protein, expressed                                     |
| 101 | LOC_Os06g04230.1 | cDNA expressed protein                                                            |
| 102 | LOC_Os06g16640.1 | cDNA carboxyl-terminal peptidase, putative, expressed                             |
| 103 | LOC_Os06g25010.1 | cDNA glycosyl hydrolase, putative, expressed                                      |
| 104 | LOC_Os06g29260.3 | cDNA retrotransposon protein, putative, unclassified, expressed                   |
| 105 | LOC_Os06g40300.1 | cDNA transposon protein, putative, unclassified                                   |
| 106 | LOC_Os06g41340.1 | cDNA retrotransposon protein, putative, unclassified, expressed                   |
| 107 | LOC_Os07g03710.1 | cDNA SCP-like extracellular protein, expressed                                    |
| 108 | LOC_Os07g03730.1 | cDNA SCP-like extracellular protein, expressed                                    |
| 109 | LOC_Os07g09420.1 | cDNA ATPase, putative, expressed                                                  |
| 110 | LOC_Os07g25550.1 | cDNA hAT dimerisation domain-containing protein, putative, expressed              |
| 111 | LOC_Os07g25960.1 | cDNA retrotransposon protein, putative, unclassified, expressed                   |
| 112 | LOC_Os07g26900.1 | cDNA alpha-galactosidase precursor, putative, expressed                           |
| 113 | LOC_Os07g35510.1 | cDNA glucan endo-1,3-beta-glucosidase precursor, putative, expressed              |
| 114 | LOC_Os07g35790.1 | cDNA TKL_IRAK_DUF26-ld.5 - DUF26 kinases have homology to DUF26 containing loci,  |
| 115 |                  | expressed                                                                         |
| 116 | LOC_Os07g41060.1 | cDNA dihydroflavonol-4-reductase, putative, expressed                             |
| 117 | LOC_Os07g43604.1 | cDNA expressed protein                                                            |
| 118 | LOC_Os08g23280.1 | cDNA expressed protein                                                            |
| 119 | LOC_Os09g09650.1 | cDNA retrotransposon protein, putative, Ty3-gypsy subclass, expressed             |
| 120 | LOC_Os09g19350.1 | cDNA expressed protein                                                            |
| 121 | LOC_Os09g29710.1 | cDNA beta-expansin precursor, putative, expressed                                 |
| 122 | LOC_Os09g31430.1 | cDNA Os9bglu30 - beta-glucosidase, similar to Os4bglu12 exoglucanase, expressed   |
| 123 | LOC_Os10g04625.1 | cDNA expressed protein                                                            |
| 124 | LOC_Os10g18820.1 | cDNA dirigent, putative, expressed                                                |
| 125 | LOC_Os10g22394.1 | cDNA retrotransposon protein, putative, unclassified, expressed                   |
| 126 | LOC_Os10g28120.1 | cDNA glycosyl hydrolase, putative, expressed                                      |
| 127 | LOC_Os10g38360.1 | cDNA glutathione S-transferase, putative, expressed                               |
| 128 | LOC_Os11g10710.1 | cDNA protein kinase domain containing protein, expressed                          |
| 129 | LOC_Os11g19864.1 | cDNA transposon protein, putative, Pong sub-class, expressed                      |
| 130 | LOC_Os11g24890.1 | cDNA expressed protein                                                            |
| 131 | LOC_Os11g26790.1 | cDNA dehydrin, putative, expressed                                                |
| 132 | LOC_Os11g37960.1 | cDNA WIP4 - Wound-induced protein precursor, expressed                            |

|     |                  |                                                                                    |
|-----|------------------|------------------------------------------------------------------------------------|
| 133 | LOC_Os12g12140.1 | cDNA expressed protein                                                             |
| 134 | LOC_Os12g15530.1 | cDNA retrotransposon protein, putative, unclassified, expressed                    |
| 135 | LOC_Os12g17480.1 | cDNA MLA12, putative, expressed                                                    |
| 136 | LOC_Os12g29400.1 | cDNA GRAM domain containing protein, expressed                                     |
| 137 | LOC_Os12g36850.1 | cDNA pathogenesis-related Bet v I family protein, putative, expressed              |
| 138 | LOC_Os12g43380.1 | cDNA thaumatin, putative, expressed                                                |
| 139 | LOC_Os12g43390.1 | cDNA thaumatin, putative, expressed                                                |
| 140 | LOC_Os01g05870.1 | cDNA receptor kinase, putative, expressed                                          |
| 141 | LOC_Os01g63380.1 | cDNA transposon protein, putative, unclassified, expressed                         |
| 142 | LOC_Os02g06580.1 | cDNA formin, putative, expressed                                                   |
| 143 | LOC_Os02g07650.1 | cDNA zinc-binding protein, putative, expressed                                     |
| 144 | LOC_Os02g39220.1 | cDNA transposon protein, putative, unclassified, expressed                         |
| 145 | LOC_Os05g31020.1 | cDNA eukaryotic peptide chain release factor subunit 1-1, putative, expressed      |
| 146 | LOC_Os05g33130.1 | cDNA CHIT17 - Chitinase family protein precursor, expressed                        |
| 147 | LOC_Os07g35004.1 | cDNA TKL_IRAK_DUF26-la.4 - DUF26 kinases have homology to DUF26 containing loci,   |
| 148 |                  | expressed                                                                          |
| 149 | LOC_Os07g46846.1 | cDNA sex determination protein tasselseed-2, putative, expressed                   |
| 150 | LOC_Os08g08980.1 | cDNA cupin domain containing protein, expressed                                    |
| 151 | LOC_Os10g04730.1 | cDNA TKL_IRAK_DUF26-la.6 - DUF26 kinases have homology to DUF26 containing loci,   |
| 152 |                  | expressed                                                                          |
| 153 | LOC_Os11g33270.1 | cDNA glycosyl hydrolases family 16, putative, expressed                            |
| 154 | LOC_Os11g37950.1 | cDNA WIP3 - Wound-induced protein precursor, expressed                             |
| 155 | LOC_Os11g40130.1 | cDNA expressed protein                                                             |
| 156 | LOC_Os12g33130.1 | cDNA expressed protein                                                             |
| 157 | LOC_Os01g04330.1 | cDNA OsCML16 - Calmodulin-related calcium sensor protein, expressed                |
| 158 | LOC_Os01g13610.1 | cDNA isoflavone reductase homolog IRL, putative, expressed                         |
| 159 | LOC_Os01g21520.1 | cDNA esterase/lipase/thioesterase family protein, putative, expressed              |
| 160 | LOC_Os01g37325.1 | cDNA retrotransposon protein, putative, unclassified, expressed                    |
| 161 | LOC_Os02g09250.1 | cDNA cytochrome P450 71D10, putative, expressed                                    |
| 162 | LOC_Os02g16940.1 | cDNA OsSub13 - Putative Subtilisin homologue, expressed                            |
| 163 | LOC_Os02g35970.1 | cDNA BTBN2 - Bric-a-Brac, Tramtrack, Broad Complex BTB domain with non-phototropic |
| 164 |                  | hypocotyl 3 NPH3 and coiled-coil domains, expressed                                |
| 165 | LOC_Os02g40330.1 | cDNA retrotransposon protein, putative, Ty3-gypsy subclass, expressed              |
| 166 | LOC_Os02g43370.1 | cDNA transposon protein, putative, unclassified, expressed                         |
| 167 | LOC_Os02g49510.1 | cDNA amino acid transporter, putative, expressed                                   |
| 168 | LOC_Os02g51930.1 | cDNA cytokinin-O-glucosyltransferase 2, putative, expressed                        |
| 169 | LOC_Os02g53620.1 | cDNA nuclear transcription factor Y subunit, putative, expressed                   |
| 170 | LOC_Os03g12510.1 | cDNA non-symbiotic hemoglobin 2, putative, expressed                               |
| 171 | LOC_Os03g51910.1 | cDNA basic helix-loop-helix protein, putative, expressed                           |
| 172 | LOC_Os03g63124.1 | cDNA retrotransposon protein, putative, unclassified, expressed                    |
| 173 | LOC_Os04g12960.1 | cDNA UDP-glucuronosyl/UDP-glucosyl transferase, putative, expressed                |
| 174 | LOC_Os04g17650.1 | cDNA sucrose synthase, putative, expressed                                         |
| 175 | LOC_Os04g36780.1 | cDNA expressed protein                                                             |
| 176 | LOC_Os04g43680.1 | cDNA MYB family transcription factor, putative, expressed                          |

|     |                  |                                                                                   |
|-----|------------------|-----------------------------------------------------------------------------------|
| 177 | LOC_Os04g52504.1 | cDNA adhesive/proline-rich protein, putative, expressed                           |
| 178 | LOC_Os05g15770.1 | cDNA glycosyl hydrolase, putative, expressed                                      |
| 179 | LOC_Os05g45820.1 | cDNA heavy metal-associated domain containing protein, expressed                  |
| 180 | LOC_Os06g11290.1 | cDNA 12-oxophytodienoate reductase, putative, expressed                           |
| 181 | LOC_Os06g21620.3 | cDNA expressed protein                                                            |
| 182 | LOC_Os06g24310.1 | cDNA retrotransposon protein, putative, unclassified, expressed                   |
| 183 | LOC_Os06g40240.1 | cDNA retrotransposon protein, putative, unclassified, expressed                   |
| 184 | LOC_Os07g03810.1 | cDNA lectin-like receptor kinase 7, putative, expressed                           |
| 185 | LOC_Os07g04040.1 | cDNA expressed protein                                                            |
| 186 | LOC_Os07g04560.1 | cDNA no apical meristem protein, putative, expressed                              |
| 187 | LOC_Os07g13660.1 | cDNA UDP-glucuronosyl and UDP-glucosyl transferase domain containing protein,     |
| 188 |                  | expressed                                                                         |
| 189 | LOC_Os07g17330.1 | cDNA B12D protein, putative, expressed                                            |
| 190 | LOC_Os07g23390.1 | cDNA expressed protein                                                            |
| 191 | LOC_Os07g30240.1 | cDNA mutS family domain IV containing protein, expressed                          |
| 192 | LOC_Os07g32710.1 | cDNA retrotransposon protein, putative, unclassified, expressed                   |
| 193 | LOC_Os08g31850.1 | cDNA expressed protein                                                            |
| 194 | LOC_Os08g40680.1 | cDNA glycosyl hydrolase, putative, expressed                                      |
| 195 | LOC_Os09g03140.1 | cDNA cytokinin-O-glucosyltransferase 2, putative, expressed                       |
| 196 | LOC_Os09g24580.1 | cDNA EF hand family protein, putative, expressed                                  |
| 197 | LOC_Os09g36810.1 | cDNA beta-galactosidase precursor, putative, expressed                            |
| 198 | LOC_Os10g03850.3 | cDNA OsFBX352 - F-box domain containing protein, expressed                        |
| 199 | LOC_Os10g10290.1 | cDNA retrotransposon protein, putative, unclassified, expressed                   |
| 200 | LOC_Os10g28350.1 | cDNA 1,2-dihydroxy-3-keto-5-methylthiopentene dioxygenase protein, putative,      |
| 201 |                  | expressed                                                                         |
| 202 | LOC_Os10g39680.1 | cDNA CHIT14 - Chitinase family protein precursor, expressed                       |
| 203 | LOC_Os11g10490.1 | cDNA transposon protein, putative, CACTA, En/Spm sub-class, expressed             |
| 204 | LOC_Os11g31680.1 | cDNA retrotransposon protein, putative, unclassified, expressed                   |
| 205 | LOC_Os11g37700.1 | cDNA pleiotropic drug resistance protein, putative, expressed                     |
| 206 | LOC_Os11g38050.1 | cDNA phosphoesterase family protein, putative, expressed                          |
| 207 | LOC_Os11g39940.1 | cDNA transposon protein, putative, unclassified, expressed                        |
| 208 | LOC_Os11g41410.1 | cDNA expressed protein                                                            |
| 209 | LOC_Os11g42240.1 | cDNA OsFBX431 - F-box domain containing protein, expressed                        |
| 210 | LOC_Os11g47600.1 | cDNA glycosyl hydrolase, putative, expressed                                      |
| 211 | LOC_Os12g07400.1 | cDNA expressed protein                                                            |
| 212 | LOC_Os12g09140.1 | cDNA expressed protein                                                            |
| 213 | LOC_Os12g14480.1 | cDNA cysteine-rich receptor-like protein kinase 23 precursor, putative, expressed |
| 214 | LOC_Os12g14520.1 | cDNA expressed protein                                                            |
| 215 | LOC_Os12g14699.1 | cDNA protein kinase domain containing protein, expressed                          |
| 216 | LOC_Os12g17490.1 | cDNA stripe rust resistance protein Yr10, putative, expressed                     |
| 217 | LOC_Os12g17500.1 | cDNA expressed protein                                                            |
| 218 | LOC_Os12g26290.5 | cDNA alpha-DOX2, putative, expressed                                              |
| 219 | LOC_Os12g26470.1 | cDNA aspartic proteinase nepenthesin-1 precursor, putative, expressed             |
| 220 | LOC_Os12g37519.2 | cDNA retrotransposon protein, putative, unclassified, expressed                   |

|     |                  |                                                                                   |
|-----|------------------|-----------------------------------------------------------------------------------|
| 221 | LOC_Os01g02300.1 | cDNA receptor kinase ORK10, putative, expressed                                   |
| 222 | LOC_Os01g06310.1 | cDNA glycine-rich cell wall structural protein precursor, putative, expressed     |
| 223 | LOC_Os01g09470.1 | cDNA IQ calmodulin-binding motif family protein, expressed                        |
| 224 | LOC_Os01g38359.1 | cDNA peptidyl-prolyl cis-trans isomerase, FKBP-type, putative, expressed          |
| 225 | LOC_Os01g42190.1 | cDNA heat shock protein DnaJ, putative, expressed                                 |
| 226 | LOC_Os01g67810.1 | cDNA transposon protein, putative, unclassified, expressed                        |
| 227 | LOC_Os02g06754.1 | cDNA expressed protein                                                            |
| 228 | LOC_Os02g06760.1 | cDNA expressed protein                                                            |
| 229 | LOC_Os02g06960.1 | cDNA expressed protein                                                            |
| 230 | LOC_Os03g09880.1 | cDNA AIR12, putative, expressed                                                   |
| 231 | LOC_Os04g08360.1 | cDNA expressed protein                                                            |
| 232 | LOC_Os04g18770.1 | cDNA retrotransposon protein, putative, unclassified, expressed                   |
| 233 | LOC_Os05g01380.1 | cDNA polygalacturonase inhibitor precursor, putative, expressed                   |
| 234 | LOC_Os05g46830.1 | cDNA proline-rich protein, putative, expressed                                    |
| 235 | LOC_Os06g39600.2 | cDNA protein phosphatase 2C, putative, expressed                                  |
| 236 | LOC_Os06g43304.1 | cDNA cytochrome P450, putative, expressed                                         |
| 237 | LOC_Os06g48210.1 | cDNA DEAD-box ATP-dependent RNA helicase, putative, expressed                     |
| 238 | LOC_Os07g14514.3 | cDNA retrotransposon protein, putative, unclassified, expressed                   |
| 239 | LOC_Os07g23720.1 | cDNA B4-BTB4 - Bric-a-Brac, Tramtrack, Broad Complex BTB domain with B4 subfamily |
| 240 |                  | conserved sequence, expressed                                                     |
| 241 | LOC_Os08g31090.1 | cDNA expressed protein                                                            |
| 242 | LOC_Os11g24590.1 | cDNA transposon protein, putative, Pong sub-class, expressed                      |
| 243 | LOC_Os11g42200.1 | cDNA laccase precursor protein, putative, expressed                               |
| 244 | LOC_Os12g12130.1 | cDNA verticillium wilt disease resistance protein, putative, expressed            |
| 245 | LOC_Os12g29290.1 | cDNA disease resistance protein RGA3, putative, expressed                         |
| 246 | LOC_Os01g02830.1 | cDNA receptor-like kinase ARK1AS, putative, expressed                             |
| 247 | LOC_Os01g08600.1 | cDNA expressed protein                                                            |
| 248 | LOC_Os01g20820.1 | cDNA expressed protein                                                            |
| 249 | LOC_Os01g54030.1 | cDNA NADP-dependent malic enzyme, putative, expressed                             |
| 250 | LOC_Os01g58280.1 | cDNA OsSub8 - Putative Subtilisin homologue, expressed                            |
| 251 | LOC_Os01g59300.1 | cDNA expressed protein                                                            |
| 252 | LOC_Os02g06779.1 | cDNA expressed protein                                                            |
| 253 | LOC_Os02g36280.1 | cDNA cytochrome P450, putative, expressed                                         |
| 254 | LOC_Os02g48570.1 | cDNA peptide transporter PTR2, putative, expressed                                |
| 255 | LOC_Os03g02874.1 | cDNA retrotransposon protein, putative, Ty3-gypsy subclass, expressed             |
| 256 | LOC_Os03g16920.1 | cDNA DnaK family protein, putative, expressed                                     |
| 257 | LOC_Os03g24830.1 | cDNA uncharacterized protein HI0077, putative, expressed                          |
| 258 | LOC_Os03g30740.1 | cDNA expressed protein                                                            |
| 259 | LOC_Os03g55389.1 | cDNA casein kinase II subunit alpha-1, putative, expressed                        |
| 260 | LOC_Os03g59450.1 | cDNA transporter-related, putative, expressed                                     |
| 261 | LOC_Os04g03380.1 | cDNA legume lectins beta domain containing protein, putative, expressed           |
| 262 | LOC_Os04g13210.1 | cDNA multidrug resistance-associated protein, putative, expressed                 |
| 263 | LOC_Os04g16440.1 | cDNA retrotransposon protein, putative, unclassified                              |
| 264 | LOC_Os04g20010.1 | cDNA retrotransposon protein, putative, unclassified, expressed                   |

|     |                  |                                                                             |
|-----|------------------|-----------------------------------------------------------------------------|
| 265 | LOC_Os04g22080.1 | cDNA retrotransposon protein, putative, unclassified, expressed             |
| 266 | LOC_Os04g30200.1 | cDNA OsFBL14 - F-box domain and LRR containing protein, expressed           |
| 267 | LOC_Os04g34230.1 | cDNA RING-H2 finger protein, putative, expressed                            |
| 268 | LOC_Os05g05390.1 | cDNA expressed protein                                                      |
| 269 | LOC_Os05g24580.1 | cDNA MEMO1, putative, expressed                                             |
| 270 | LOC_Os05g39250.1 | cDNA phosphatidylethanolamine-binding protein, putative, expressed          |
| 271 | LOC_Os05g43390.1 | cDNA signal recognition particle 54 kDa protein, putative, expressed        |
| 272 | LOC_Os06g38660.1 | cDNA expressed protein                                                      |
| 273 | LOC_Os06g46740.1 | cDNA early nodulin 20 precursor, putative, expressed                        |
| 274 | LOC_Os07g09710.1 | cDNA OsFBX220 - F-box domain containing protein, expressed                  |
| 275 | LOC_Os07g23510.1 | cDNA expressed protein                                                      |
| 276 | LOC_Os07g40290.1 | cDNA OsGH3.8 - Probable indole-3-acetic acid-amido synthetase, expressed    |
| 277 | LOC_Os08g02030.1 | cDNA transferase family protein, putative, expressed                        |
| 278 | LOC_Os08g13780.1 | cDNA U-box domain-containing protein, putative, expressed                   |
| 279 | LOC_Os08g34300.1 | cDNA retrotransposon protein, putative, unclassified, expressed             |
| 280 | LOC_Os08g34830.1 | cDNA hAT dimerisation domain-containing protein, putative, expressed        |
| 281 | LOC_Os08g41070.1 | cDNA retrotransposon protein, putative, unclassified, expressed             |
| 282 | LOC_Os09g17190.1 | cDNA OsFBX320 - F-box domain containing protein, expressed                  |
| 283 | LOC_Os09g21120.1 | cDNA armadillo/beta-catenin repeat family protein, putative, expressed      |
| 284 | LOC_Os09g21180.1 | cDNA homeobox associated leucine zipper, putative, expressed                |
| 285 | LOC_Os09g27260.1 | cDNA plant viral response family protein, putative, expressed               |
| 286 | LOC_Os09g28210.1 | cDNA bHelix-loop-helix transcription factor, putative, expressed            |
| 287 | LOC_Os09g28520.1 | cDNA expressed protein                                                      |
| 288 | LOC_Os09g29690.1 | cDNA beta-expansin precursor, putative, expressed                           |
| 289 | LOC_Os09g39280.1 | cDNA expressed protein                                                      |
| 290 | LOC_Os10g05820.1 | cDNA POEI5 - Pollen Ole e I allergen and extensin family protein precursor, |
| 291 |                  | expressed                                                                   |
| 292 | LOC_Os10g37960.1 | cDNA retrotransposon protein, putative, unclassified, expressed             |
| 293 | LOC_Os10g41410.2 | cDNA nucleoside diphosphate kinase, putative, expressed                     |
| 294 | LOC_Os10g41550.1 | cDNA beta-amylase, putative, expressed                                      |
| 295 | LOC_Os11g19840.1 | cDNA O-methyltransferase, putative, expressed                               |
| 296 | LOC_Os11g25330.1 | cDNA nucleoside-triphosphatase, putative, expressed                         |
| 297 | LOC_Os11g26760.1 | cDNA dehydrin, putative, expressed                                          |
| 298 | LOC_Os11g26780.1 | cDNA dehydrin, putative, expressed                                          |
| 299 | LOC_Os11g31450.1 | cDNA expressed protein                                                      |
| 300 | LOC_Os11g33310.1 | cDNA OsFBX424 - F-box domain containing protein, expressed                  |
| 301 | LOC_Os11g33320.1 | cDNA OsFBX425 - F-box domain containing protein, expressed                  |
| 302 | LOC_Os11g40150.1 | cDNA DNA repair protein Rad51, putative, expressed                          |
| 303 | LOC_Os11g43990.1 | cDNA expressed protein                                                      |
| 304 | LOC_Os11g44014.1 | cDNA retrotransposon protein, putative, unclassified, expressed             |
| 305 | LOC_Os12g08025.1 | cDNA expressed protein                                                      |
| 306 | LOC_Os12g08030.1 | cDNA expressed protein                                                      |
| 307 | LOC_Os12g12570.1 | cDNA expressed protein                                                      |
| 308 | LOC_Os12g17400.1 | cDNA retrotransposon protein, putative, unclassified                        |

|     |                        |                                                                               |
|-----|------------------------|-------------------------------------------------------------------------------|
| 309 | LOC_Os12g22110.1       | cDNA ABC-2 type transporter, putative, expressed                              |
| 310 | LOC_Os12g32280.1       | cDNA SWIB/MDM2 domain containing protein, expressed                           |
| 311 | LOC_Os12g43450.1       | cDNA thaumatin family domain containing protein, expressed                    |
| 312 | LOC_Os01g03830.1       | cDNA retrotransposon protein, putative, unclassified, expressed               |
| 313 | LOC_Os01g06836.1       | cDNA disease resistance protein SlVe2 precursor, putative, expressed          |
| 314 | LOC_Os01g28790.1       | cDNA PRAS-rich protein, putative, expressed                                   |
| 315 | LOC_Os01g40860.1       | cDNA aldehyde dehydrogenase, putative, expressed                              |
| 316 | LOC_Os01g42110.1       | cDNA nodulin MtN3 family protein, putative, expressed                         |
| 317 | LOC_Os01g53750.1       | cDNA glucan endo-1,3-beta-glucosidase precursor, putative, expressed          |
| 318 | LOC_Os02g57090.1       | cDNA anthranilate phosphoribosyltransferase, putative, expressed              |
| 319 | LOC_Os03g56540.3       | cDNA heat shock protein DnaJ, putative, expressed                             |
| 320 | LOC_Os04g57810.1       | cDNA GA18008-PA, putative, expressed                                          |
| 321 | LOC_Os04g57880.1       | cDNA heat shock protein DnaJ, putative, expressed                             |
| 322 | LOC_Os07g03250.1       | cDNA AP2-like ethylene-responsive transcription factor PLETHORA 2, putative,  |
| 323 |                        | expressed                                                                     |
| 324 | LOC_Os09g39290.1       | cDNA retrotransposon protein, putative, unclassified, expressed               |
| 325 | LOC_Os10g04660.1       | cDNA expressed protein                                                        |
| 326 | LOC_Os10g20810.1       | cDNA transposon protein, putative, CACTA, En/Spm sub-class, expressed         |
| 327 | LOC_Os11g31430.1       | cDNA expressed protein                                                        |
| 328 | LOC_Os11g38160.1       | cDNA transporter family protein, putative, expressed                          |
| 329 | LOC_Os12g08000.1       | cDNA 5-nucleotidase domain-containing protein, putative, expressed            |
| 330 |                        |                                                                               |
| 331 | <b>Down-regulation</b> |                                                                               |
| 332 | GeneID                 | Description                                                                   |
| 333 | LOC_Os07g07715.1       | cDNA expressed protein                                                        |
| 334 | LOC_Os01g42320.1       | cDNA aspartic proteinase nepenthesin-2 precursor, putative, expressed         |
| 335 | LOC_Os04g29770.1       | cDNA wall-associated receptor kinase-like 3 precursor, putative, expressed    |
| 336 | LOC_Os04g29810.1       | cDNA expressed protein                                                        |
| 337 | LOC_Os07g35985.1       | cDNA expressed protein                                                        |
| 338 | LOC_Os08g25250.1       | cDNA retrotransposon protein, putative, unclassified, expressed               |
| 339 | LOC_Os11g40160.1       | cDNA expressed protein                                                        |
| 340 | LOC_Os12g11220.1       | cDNA expressed protein                                                        |
| 341 | LOC_Os12g28137.1       | cDNA ATPase 3, putative, expressed                                            |
| 342 | LOC_Os01g68300.1       | cDNA expressed protein                                                        |
| 343 | LOC_Os08g08690.1       | cDNA expressed protein                                                        |
| 344 | LOC_Os10g11870.1       | cDNA transposon protein, putative, CACTA, En/Spm sub-class, expressed         |
| 345 | LOC_Os11g03520.1       | cDNA GDSL-like lipase/acylhydrolase, putative, expressed                      |
| 346 | LOC_Os11g10850.1       | cDNA dirigent, putative, expressed                                            |
| 347 | LOC_Os11g37490.1       | cDNA expressed protein                                                        |
| 348 | LOC_Os12g12850.1       | cDNA ATP-dependent Clp protease ATP-binding subunit clpA homolog, chloroplast |
| 349 |                        | precursor, putative, expressed                                                |
| 350 | LOC_Os03g18740.1       | cDNA oxidoreductase, short chain dehydrogenase/reductase family, putative,    |
| 351 |                        | expressed                                                                     |
| 352 | LOC_Os04g30180.1       | cDNA F-box/LRR-repeat protein 14, putative, expressed                         |



|     |                  |                                                                                     |
|-----|------------------|-------------------------------------------------------------------------------------|
| 353 | LOC_Os02g24190.1 | cDNA cyclin-T1-2, putative, expressed                                               |
| 354 | LOC_Os02g53180.2 | cDNA 1-aminocyclopropane-1-carboxylate oxidase protein, putative, expressed         |
| 355 | LOC_Os03g26229.1 | cDNA 40S ribosomal protein S9-1, putative, expressed                                |
| 356 | LOC_Os03g29184.1 | cDNA expressed protein                                                              |
| 357 | LOC_Os04g21130.1 | cDNA F-box protein PP2-B1, putative, expressed                                      |
| 358 | LOC_Os04g29790.1 | cDNA OsWAK40 - OsWAK receptor-like protein OsWAK-RLP, expressed                     |
| 359 | LOC_Os06g38120.1 | cDNA low-affinity cation transporter, putative, expressed                           |
| 360 | LOC_Os06g42240.1 | cDNA transposon protein, putative, unclassified, expressed                          |
| 361 | LOC_Os07g07760.1 | cDNA expressed protein                                                              |
| 362 | LOC_Os07g17270.1 | cDNA retrotransposon protein, putative, unclassified, expressed                     |
| 363 | LOC_Os07g18750.1 | cDNA LTPL42 - Protease inhibitor/seed storage/LTP family protein precursor,         |
| 364 |                  | expressed                                                                           |
| 365 | LOC_Os07g35140.1 | cDNA receptor-like serine-threonine protein kinase, putative, expressed             |
| 366 | LOC_Os08g10630.1 | cDNA metal cation transporter, putative, expressed                                  |
| 367 | LOC_Os08g25734.2 | cDNA glucose-1-phosphate adenyltransferase large subunit, chloroplast precursor,    |
| 368 |                  | putative, expressed                                                                 |
| 369 | LOC_Os11g38330.2 | cDNA ZOS11-06 - C2H2 zinc finger protein, expressed                                 |
| 370 | LOC_Os11g40390.1 | cDNA expressed protein                                                              |
| 371 | LOC_Os11g42040.1 | cDNA non-TIR-NBS-LRR type resistance protein, putative, expressed                   |
| 372 | LOC_Os12g12000.1 | cDNA RALFL46 - Rapid Alkalinization Factor RALF family protein precursor, expressed |
| 373 | LOC_Os12g17160.1 | cDNA flavonol sulfotransferase, putative, expressed                                 |
| 374 | LOC_Os12g33610.1 | cDNA phenylalanine ammonia-lyase, putative, expressed                               |
| 375 | LOC_Os05g43340.1 | cDNA retrotransposon protein, putative, unclassified, expressed                     |
| 376 | LOC_Os07g40690.1 | cDNA NAD dependent epimerase/dehydratase family protein, putative, expressed        |
| 377 | LOC_Os10g19910.1 | cDNA expressed protein                                                              |
| 378 | LOC_Os11g48110.1 | cDNA phenylalanine ammonia-lyase, putative, expressed                               |
| 379 | LOC_Os12g27370.1 | cDNA expressed protein                                                              |
| 380 | LOC_Os12g34796.1 | cDNA expressed protein                                                              |
| 381 | LOC_Os01g23600.1 | cDNA expressed protein                                                              |
| 382 | LOC_Os01g42780.1 | cDNA cysteine proteinase EP-B 2 precursor, putative, expressed                      |
| 383 | LOC_Os02g04945.1 | cDNA phosphatidate cytidyltransferase family protein, putative, expressed           |
| 384 | LOC_Os02g06560.1 | cDNA wound induced protein, putative, expressed                                     |
| 385 | LOC_Os02g50540.1 | cDNA expressed protein                                                              |
| 386 | LOC_Os03g20780.1 | cDNA ethylene-insensitive 3, putative, expressed                                    |
| 387 | LOC_Os04g26590.1 | cDNA expressed protein                                                              |
| 388 | LOC_Os04g30030.1 | cDNA cysteine-rich receptor-like protein kinase 12 precursor, putative, expressed   |
| 389 | LOC_Os04g30160.1 | cDNA OsWAK46 - OsWAK receptor-like protein kinase, expressed                        |
| 390 | LOC_Os04g30330.1 | cDNA OsWAK59 - OsWAK receptor-like cytoplasmic kinase OsWAK-RLCK, expressed         |
| 391 | LOC_Os04g49500.1 | cDNA U-box domain-containing protein, putative, expressed                           |
| 392 | LOC_Os06g41030.1 | cDNA DUF1680 domain containing protein, putative, expressed                         |
| 393 | LOC_Os06g48810.1 | cDNA OsHKT2;1 - Na <sup>+</sup> transporter, expressed                              |
| 394 | LOC_Os07g03960.1 | cDNA transporter family protein, putative, expressed                                |
| 395 | LOC_Os07g06500.1 | cDNA OsFBL34 - F-box domain and LRR containing protein, expressed                   |
| 396 | LOC_Os07g07820.1 | cDNA expressed protein                                                              |

|     |                  |                                                                                  |
|-----|------------------|----------------------------------------------------------------------------------|
| 397 | LOC_Os07g08290.1 | cDNA expressed protein                                                           |
| 398 | LOC_Os07g09675.1 | cDNA expressed protein                                                           |
| 399 | LOC_Os07g13534.1 | cDNA expressed protein                                                           |
| 400 | LOC_Os07g30280.1 | cDNA csAtPR5, putative, expressed                                                |
| 401 | LOC_Os07g35810.1 | cDNA TKL_IRAK_DUF26-ld.6 - DUF26 kinases have homology to DUF26 containing loci, |
| 402 |                  | expressed                                                                        |
| 403 | LOC_Os07g35979.1 | cDNA expressed protein                                                           |
| 404 | LOC_Os07g40850.1 | cDNA retrotransposon protein, putative, unclassified, expressed                  |
| 405 | LOC_Os07g48170.1 | cDNA nucleotidyltransferase, putative, expressed                                 |
| 406 | LOC_Os08g02070.1 | cDNA OsMADS26 - MADS-box family gene with MIKCC type-box, expressed              |
| 407 | LOC_Os08g02900.1 | cDNA expressed protein                                                           |
| 408 | LOC_Os08g02990.1 | cDNA retrotransposon protein, putative, unclassified, expressed                  |
| 409 | LOC_Os08g06280.9 | cDNA LSD1 zinc finger domain containing protein, expressed                       |
| 410 | LOC_Os09g18020.1 | cDNA senescence-induced receptor-like serine/threonine-protein kinase precursor, |
| 411 |                  | putative, expressed                                                              |
| 412 | LOC_Os10g04570.1 | cDNA expressed protein                                                           |
| 413 | LOC_Os10g09684.1 | cDNA expressed protein                                                           |
| 414 | LOC_Os10g20480.2 | cDNA transposon protein, putative, CACTA, En/Spm sub-class, expressed            |
| 415 | LOC_Os10g34730.1 | cDNA GEM, putative, expressed                                                    |
| 416 | LOC_Os10g40430.1 | cDNA LTPL139 - Protease inhibitor/seed storage/LTP family protein precursor,     |
| 417 |                  | expressed                                                                        |
| 418 | LOC_Os11g40249.2 | cDNA expressed protein                                                           |
| 419 | LOC_Os11g42030.1 | cDNA expressed protein                                                           |
| 420 | LOC_Os12g11830.1 | cDNA expressed protein                                                           |
| 421 | LOC_Os12g23754.1 | cDNA expressed protein                                                           |
| 422 | LOC_Os12g25494.1 | cDNA transposon protein, putative, unclassified, expressed                       |
| 423 | LOC_Os12g26480.1 | cDNA expressed protein                                                           |
| 424 | LOC_Os12g27335.1 | cDNA expressed protein                                                           |
| 425 | LOC_Os12g40880.2 | cDNA phosphoribulokinase/Uridine kinase family protein, expressed                |
| 426 | LOC_Os02g47920.1 | cDNA ZOS2-16 - C2H2 zinc finger protein, expressed                               |
| 427 | LOC_Os03g40060.1 | cDNA expressed protein                                                           |
| 428 | LOC_Os05g25240.1 | cDNA expressed protein                                                           |
| 429 | LOC_Os06g44540.1 | cDNA HOTHEAD precursor, putative, expressed                                      |
| 430 | LOC_Os06g48560.1 | cDNA transferase family protein, putative, expressed                             |
| 431 | LOC_Os07g08350.1 | cDNA C4-dicarboxylate transporter/malic acid transport protein, expressed        |
| 432 | LOC_Os07g14430.1 | cDNA transposon protein, putative, CACTA, En/Spm sub-class, expressed            |
| 433 | LOC_Os07g35880.1 | cDNA beta-amylase, putative, expressed                                           |
| 434 | LOC_Os07g48980.1 | cDNA nicotianamine synthase, putative, expressed                                 |
| 435 | LOC_Os09g23300.1 | cDNA integral membrane protein, putative, expressed                              |
| 436 | LOC_Os11g25040.1 | cDNA plant-specific domain TIGR01615 family protein, expressed                   |
| 437 | LOC_Os11g38480.1 | cDNA NBS-LRR type disease resistance protein, putative, expressed                |
| 438 | LOC_Os11g42660.1 | cDNA Leucine Rich Repeat family protein, expressed                               |
| 439 | LOC_Os12g29280.1 | cDNA disease resistance protein RGA3, putative, expressed                        |
| 440 | LOC_Os01g08020.1 | cDNA boron transporter protein, putative, expressed                              |

|     |                  |                                                                           |
|-----|------------------|---------------------------------------------------------------------------|
| 441 | LOC_Os01g23710.1 | cDNA no apical meristem protein, putative, expressed                      |
| 442 | LOC_Os01g39700.1 | cDNA expressed protein                                                    |
| 443 | LOC_Os01g45274.2 | cDNA carbonic anhydrase, chloroplast precursor, putative, expressed       |
| 444 | LOC_Os01g68460.1 | cDNA DC1, putative, expressed                                             |
| 445 | LOC_Os01g68740.1 | cDNA keratin, type I cytoskeletal 9, putative, expressed                  |
| 446 | LOC_Os03g60419.1 | cDNA expressed protein                                                    |
| 447 | LOC_Os03g61310.1 | cDNA receptor-like protein kinase, putative, expressed                    |
| 448 | LOC_Os04g25650.1 | cDNA cysteine-rich receptor-like protein kinase, putative, expressed      |
| 449 | LOC_Os04g26320.1 | cDNA mannose-binding lectin, putative, expressed                          |
| 450 | LOC_Os04g30240.1 | cDNA OsWAK60 - OsWAK receptor-like protein kinase, expressed              |
| 451 | LOC_Os04g32840.1 | cDNA formin-like protein 20, putative, expressed                          |
| 452 | LOC_Os04g47360.1 | cDNA OsPOP9 - Putative Prolyl Oligopeptidase homologue, expressed         |
| 453 | LOC_Os05g44260.1 | cDNA DUF584 domain containing protein, putative, expressed                |
| 454 | LOC_Os06g10355.1 | cDNA expressed protein                                                    |
| 455 | LOC_Os06g16050.1 | cDNA transposon protein, putative, CACTA, En/Spm sub-class, expressed     |
| 456 | LOC_Os07g04020.1 | cDNA expressed protein                                                    |
| 457 | LOC_Os07g09950.1 | cDNA OsFBX222 - F-box domain containing protein, expressed                |
| 458 | LOC_Os07g12390.1 | cDNA expressed protein                                                    |
| 459 | LOC_Os07g23210.1 | cDNA transposon protein, putative, unclassified, expressed                |
| 460 | LOC_Os07g34620.1 | cDNA expressed protein                                                    |
| 461 | LOC_Os07g40620.1 | cDNA saccharopine dehydrogenase, putative, expressed                      |
| 462 | LOC_Os07g40890.1 | cDNA IgA FC receptor precursor, putative, expressed                       |
| 463 | LOC_Os07g41400.1 | cDNA EGG APPARATUS-1, putative, expressed                                 |
| 464 | LOC_Os08g03180.1 | cDNA retrotransposon protein, putative, unclassified, expressed           |
| 465 | LOC_Os08g20486.1 | cDNA transposon protein, putative, unclassified, expressed                |
| 466 | LOC_Os09g15284.1 | cDNA expressed protein                                                    |
| 467 | LOC_Os10g05250.1 | cDNA protein kinase domain containing protein, expressed                  |
| 468 | LOC_Os11g01010.1 | cDNA autophagy-related protein 8D, putative, expressed                    |
| 469 | LOC_Os11g10790.1 | cDNA expressed protein                                                    |
| 470 | LOC_Os11g38040.1 | cDNA expressed protein                                                    |
| 471 | LOC_Os11g38520.1 | cDNA expressed protein                                                    |
| 472 | LOC_Os11g42060.1 | cDNA Leucine Rich Repeat family protein, expressed                        |
| 473 | LOC_Os12g08250.1 | cDNA expressed protein                                                    |
| 474 | LOC_Os12g08580.1 | cDNA retrotransposon protein, putative, unclassified, expressed           |
| 475 | LOC_Os12g11510.1 | cDNA hcr2-0B, putative, expressed                                         |
| 476 | LOC_Os12g11870.1 | cDNA expressed protein                                                    |
| 477 | LOC_Os12g12765.1 | cDNA expressed protein                                                    |
| 478 | LOC_Os12g14110.1 | cDNA expressed protein                                                    |
| 479 | LOC_Os12g14126.1 | cDNA retrotransposon protein, putative, Tyl-copia subclass, expressed     |
| 480 | LOC_Os12g15505.1 | cDNA expressed protein                                                    |
| 481 | LOC_Os12g18340.1 | cDNA transposon protein, putative, unclassified, expressed                |
| 482 | LOC_Os12g19470.1 | cDNA ribulose biphosphate carboxylase small chain, chloroplast precursor, |
| 483 |                  | putative, expressed                                                       |
| 484 | LOC_Os12g23150.1 | cDNA 4-nitrophenylphosphatase-like, putative, expressed                   |

|     |                  |                                                                        |
|-----|------------------|------------------------------------------------------------------------|
| 485 | LOC_Os12g23780.1 | cDNA expressed protein                                                 |
| 486 | LOC_Os12g26220.1 | cDNA expressed protein                                                 |
| 487 | LOC_Os12g26510.1 | cDNA expressed protein                                                 |
| 488 | LOC_Os12g26850.1 | cDNA retrotransposon protein, putative, unclassified, expressed        |
| 489 | LOC_Os12g26860.1 | cDNA retrotransposon protein, putative, Ty3-gypsy subclass, expressed  |
| 490 | LOC_Os12g26875.1 | cDNA expressed protein                                                 |
| 491 | LOC_Os12g29740.1 | cDNA expressed protein                                                 |
| 492 | LOC_Os12g33289.1 | cDNA expressed protein                                                 |
| 493 | LOC_Os12g35260.1 | cDNA expressed protein                                                 |
| 494 | LOC_Os12g36580.1 | cDNA transposon protein, putative, CACTA, En/Spm sub-class, expressed  |
| 495 | LOC_Os06g10350.1 | cDNA MYB family transcription factor, putative, expressed              |
| 496 | LOC_Os06g12320.1 | cDNA transmembrane amino acid transporter protein, putative, expressed |
| 497 | LOC_Os07g16364.1 | cDNA expressed protein                                                 |
| 498 | LOC_Os07g16600.1 | cDNA expressed protein                                                 |
| 499 | LOC_Os07g32950.1 | cDNA dnaJ C terminal region family protein, expressed                  |
| 500 | LOC_Os07g48390.1 | cDNA proline-rich protein, putative, expressed                         |
| 501 | LOC_Os08g02904.1 | cDNA expressed protein                                                 |
| 502 | LOC_Os08g35490.1 | cDNA ctr copper transporter family protein, putative, expressed        |
| 503 | LOC_Os10g04860.1 | cDNA aldehyde oxidase, putative, expressed                             |
| 504 | LOC_Os12g12090.1 | cDNA expressed protein                                                 |
| 505 | LOC_Os12g31540.1 | cDNA expressed protein                                                 |
| 506 | LOC_Os12g34802.1 | cDNA expressed protein                                                 |
| 507 | LOC_Os01g13130.1 | cDNA aquaporin protein, putative, expressed                            |
| 508 | LOC_Os01g41160.1 | cDNA FAD dependent oxidoreductase domain containing protein, expressed |
| 509 | LOC_Os01g58910.1 | cDNA auxin-induced protein 5NG4, putative, expressed                   |
| 510 | LOC_Os02g24205.1 | cDNA expressed protein                                                 |
| 511 | LOC_Os02g45770.1 | cDNA OsMADS6 - MADS-box family gene with MIKCc type-box, expressed     |
| 512 | LOC_Os04g10924.1 | cDNA expressed protein                                                 |
| 513 | LOC_Os04g26350.1 | cDNA Leucine Rich Repeat family protein, expressed                     |
| 514 | LOC_Os04g26380.1 | cDNA aspartic proteinase-like protein 2 precursor, putative, expressed |
| 515 | LOC_Os04g28820.1 | cDNA retrotransposon protein, putative, unclassified, expressed        |
| 516 | LOC_Os04g30340.1 | cDNA wall-associated receptor kinase, putative, expressed              |
| 517 | LOC_Os05g23393.1 | cDNA expressed protein                                                 |
| 518 | LOC_Os05g25400.1 | cDNA RNA binding protein, putative, expressed                          |
| 519 | LOC_Os05g42360.1 | cDNA expressed protein                                                 |
| 520 | LOC_Os06g07878.1 | cDNA peptidase, T1 family, putative, expressed                         |
| 521 | LOC_Os06g15730.1 | cDNA expressed protein                                                 |
| 522 | LOC_Os07g01070.1 | cDNA peptide transporter, putative, expressed                          |
| 523 | LOC_Os07g06530.1 | cDNA expressed protein                                                 |
| 524 | LOC_Os07g08934.1 | cDNA expressed protein                                                 |
| 525 | LOC_Os07g19410.1 | cDNA expressed protein                                                 |
| 526 | LOC_Os07g20164.1 | cDNA expressed protein                                                 |
| 527 | LOC_Os07g30980.1 | cDNA uvrD/REP helicase family protein, putative, expressed             |
| 528 | LOC_Os07g35960.1 | cDNA expressed protein                                                 |

|     |                  |                                                                             |
|-----|------------------|-----------------------------------------------------------------------------|
| 529 | LOC_Os07g40640.1 | cDNA expressed protein                                                      |
| 530 | LOC_Os07g40900.1 | cDNA retrotransposon protein, putative, unclassified, expressed             |
| 531 | LOC_Os07g40910.1 | cDNA expressed protein                                                      |
| 532 | LOC_Os07g48490.2 | cDNA stress responsive protein, putative, expressed                         |
| 533 | LOC_Os07g48500.1 | cDNA stress responsive protein, putative, expressed                         |
| 534 | LOC_Os08g10244.1 | cDNA retrotransposon protein, putative, unclassified, expressed             |
| 535 | LOC_Os08g15149.1 | cDNA oxidoreductase, 2OG-Fe oxygenase family protein, expressed             |
| 536 | LOC_Os09g19280.1 | cDNA retrotransposon protein, putative, unclassified, expressed             |
| 537 | LOC_Os09g32169.1 | cDNA expressed protein                                                      |
| 538 | LOC_Os10g18150.1 | cDNA crooked neck, putative, expressed                                      |
| 539 | LOC_Os10g20480.3 | cDNA transposon protein, putative, CACTA, En/Spm sub-class, expressed       |
| 540 | LOC_Os11g33394.1 | cDNA plant protein of unknown function domain containing protein, expressed |
| 541 | LOC_Os11g39160.1 | cDNA NBS-LRR disease resistance protein, putative, expressed                |
| 542 | LOC_Os12g03110.1 | cDNA ZF-HD protein dimerisation region containing protein, expressed        |
| 543 | LOC_Os12g08210.1 | cDNA expressed protein                                                      |
| 544 | LOC_Os12g12664.2 | cDNA expressed protein                                                      |
| 545 | LOC_Os12g12690.1 | cDNA transposon protein, putative, Pong sub-class, expressed                |
| 546 | LOC_Os12g20390.1 | cDNA expressed protein                                                      |
| 547 | LOC_Os12g21730.1 | cDNA retrotransposon protein, putative, unclassified, expressed             |
| 548 | LOC_Os12g25280.1 | cDNA expressed protein                                                      |
| 549 | LOC_Os12g26870.1 | cDNA retrotransposon protein, putative, Ty3-gypsy subclass, expressed       |
| 550 | LOC_Os12g26970.1 | cDNA transposon protein, putative, CACTA, En/Spm sub-class, expressed       |
| 551 | LOC_Os12g33160.1 | cDNA RGH1A, putative, expressed                                             |
| 552 | LOC_Os01g55570.4 | cDNA expressed protein                                                      |
| 553 | LOC_Os01g57599.1 | cDNA retrotransposon protein, putative, unclassified, expressed             |
| 554 | LOC_Os02g56860.1 | cDNA 3-ketoacyl-CoA synthase, putative, expressed                           |
| 555 | LOC_Os04g31790.1 | cDNA expressed protein                                                      |
| 556 | LOC_Os06g07923.1 | cDNA expressed protein                                                      |
| 557 | LOC_Os07g03990.1 | cDNA leucine-rich repeat family protein, putative, expressed                |
| 558 | LOC_Os07g31690.1 | cDNA retrotransposon protein, putative, unclassified, expressed             |
| 559 | LOC_Os07g40920.1 | cDNA APO, putative, expressed                                               |
| 560 | LOC_Os09g19290.1 | cDNA retrotransposon protein, putative, unclassified, expressed             |
| 561 | LOC_Os10g16440.2 | cDNA CUE domain containing protein, expressed                               |
| 562 | LOC_Os10g35604.1 | cDNA expressed protein                                                      |
| 563 | LOC_Os11g14440.1 | cDNA expressed protein                                                      |
| 564 | LOC_Os12g14059.1 | cDNA expressed protein                                                      |
| 565 | LOC_Os12g22839.1 | cDNA expressed protein                                                      |
| 566 | LOC_Os12g33180.1 | cDNA pnn protein, putative, expressed                                       |
| 567 | LOC_Os12g43850.1 | cDNA retrotransposon protein, putative, unclassified, expressed             |
| 568 |                  |                                                                             |
