# Supplementary material
Source: PubMed Central journal article supplement (PMC4825140)
Supplement: supp_pp.15.01283_PP2015-01283DR3_Supplemental_Materialfigs.pdf [file supp_pp.15.01283_PP2015-01283DR3_Supplemental_Materialfigs.pdf]

# Figure S1

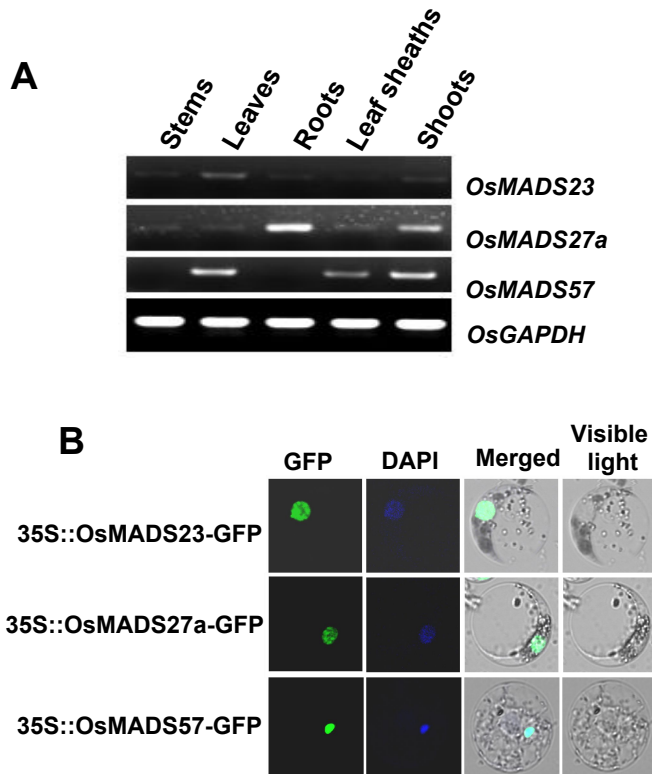

**Supplemental Figure S1. Expression patterns and protein localizations of *OsMADS23*, *OsMADS27a* and *OsMADS57*.** (A) RT-PCR analysis of the expression of *OsMADS23*, *OsMADS27a* and *OsMADS57* in different rice tissues. (B) *OsMADS23*-GFP, *OsMADS27a*-GFP and *OsMADS57*-GFP located in the nucleus in rice protoplasts. 4', 6-diamidino-2-phenylindole (DAPI) is a nuclear staining dye.

## Figure S2

|                   |   |   |   |   |   |   |
|-------------------|---|---|---|---|---|---|
| GST::OsMADS23     | + | + | - | - | - | - |
| GST::OsMADS27a    | - | - | + | + | - | - |
| GST::OsMADS57     | - | - | - | - | + | + |
| Probe             | - | + | - | + | - | + |
| Mutant probe      | + | - | + | - | + | - |
| Mutant competitor | - | + | - | + | - | + |

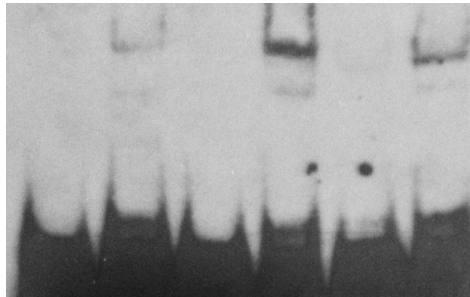

Probe sequence: **gtgctagaaatagctatatttgggacgga**

Mutant probe sequence: **gtgctagaaatagaaaaaaaaaggacgga**

**Supplemental Figure S2.** EMSAs showed that OsMADS23, OsMADS27a and OsMADS57 bound to the CArG motif of the *OsRDR1* promoter, but not the CArG mutant sequence.

# Figure S3

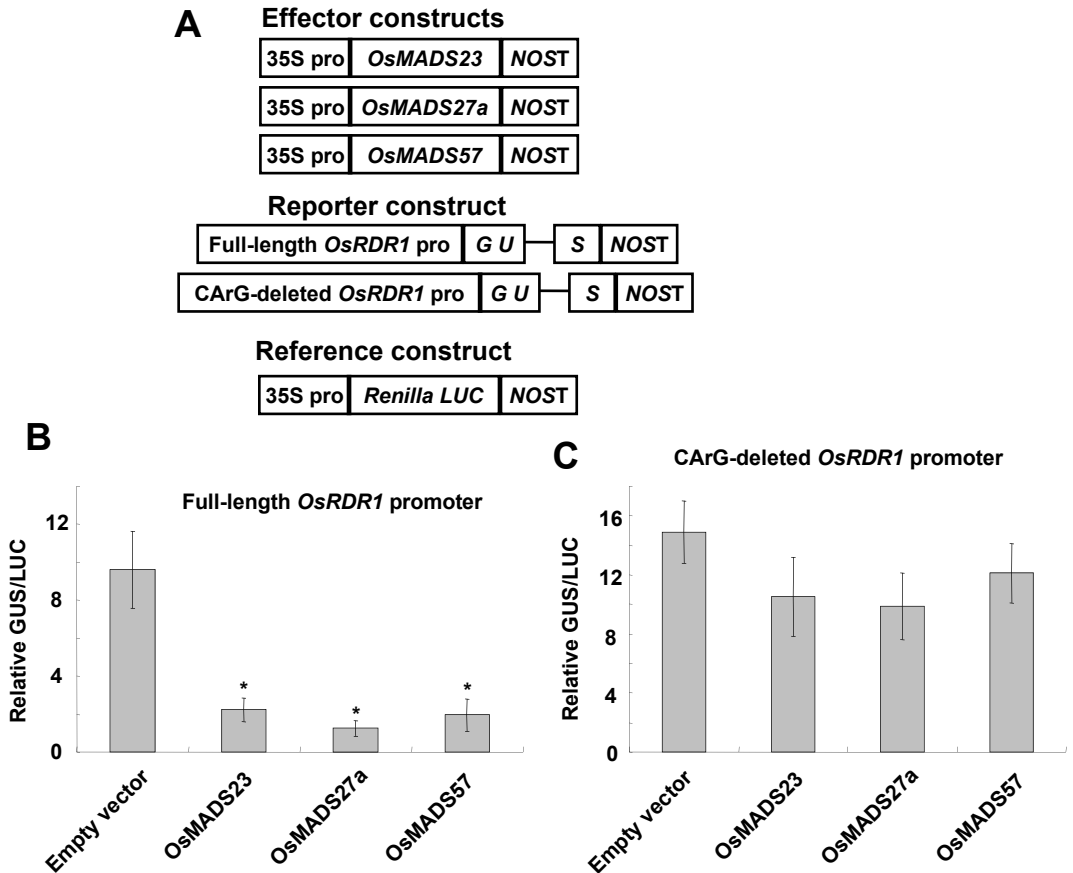

## Supplemental Figure S3. *OsMADS23*, *OsMADS27a* and *OsMADS57* repress the expression of *OsRDR1* through binding to the CARg motifs.

(A) The schematic structures of the effector and reporter constructs for transient expression assay in *Nicotiana benthamiana* leaves, in which *OsMADS23*, *OsMADS27a* and *OsMADS57* were under the control of the CaMV 35S promoter, the *GUS* reporter gene harboring an intron was driven by the full-length or CARg-deleted *OsRDR1* promoter and the *Renilla luciferase (LUC)* gene derived by the 35S promoter was used as an internal reference. (B,C) Transient expression assay in *Nicotiana benthamiana* leaves. The relative GUS activities were normalized to the activities of *Renilla luciferase (LUC)* and averaged from three biological repeats. The error bars indicate  $\pm$  standard error (SE). Asterisks indicate significant differences compared with the empty vector samples (Student's *t*-test analysis,  $*P < 0.05$ ).

## Figure S4

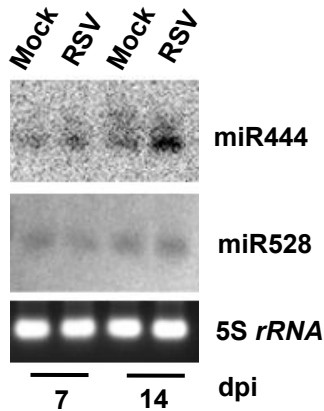

**Supplemental Figure S4. miR444 accumulation was induced by virus infection in RSV-insusceptible rice plants.** RSV-insusceptible (*Oryza sativa ssp. japonica* Zhendao88) rice plants were inoculated by RSV, then accumulation of miR444 and miR528 was estimated by small RNA gel blot at 7- and 14 dpi. 5S rRNA bands were visualized by ethidium bromide staining and served as a loading control.
