# Supplementary material
Source: PubMed Central journal article supplement (PMC4825140)
Supplement: supp_pp.15.01283_PP2015-01283DR3_Supplemental_Materialtbls2_3.pdf [file supp_pp.15.01283_PP2015-01283DR3_Supplemental_Materialtbls2_3.pdf]

**Supplemental Table 2 Summary of the CArG motifs in the *OsRDR1* promoter region**

| Location | Sequence   |
|----------|------------|
| -729     | ctatattatg |
| -923     | ctaaaatttg |
| -1311    | ccaaaaaagg |
| -1401    | ctatattttg |
| -1436    | ctttattttg |

**Supplemental Table 3 Summary of the primers and probes in this study**

**Primers**

**Y2H assay**

|        |                                                     |
|--------|-----------------------------------------------------|
| M23-F  | GGGGACAAGTTTGTACAAAAAAGCAGGCTTAATGGGGAGAGGGAAGATAG  |
| M23-R  | GGGGACCACTTTGTACAAGAAAGCTGGGTC AGTGGTAACAACCTTCCTGC |
| M27a-F | GGGGACAAGTTTGTACAAAAAAGCAGGCTTAATGGGGAGGGGGAAGATTGT |
| M27a-R | GGGGACCACTTTGTACAAGAAAGCTGGGTC TGGATTCAACTGTAACCCTA |
| M57-F  | GGGGACAAGTTTGTACAAAAAAGCAGGCTTAATGGGGAGGGGGAAGATAG  |
| M57-R  | GGGGACCACTTTGTACAAGAAAGCTGGGTC AGGCAGATGAAGTCCCAG   |

**Y1H assay**

**pGAD424**

|        |                                   |
|--------|-----------------------------------|
| m23-F  | GGAATTCATGGGGAGAGGGAAGATAGAGATAA  |
| m23-R  | CGGATCCCTAAGTGGTAACAACCTTCCTGCTT  |
| m27a-F | GGAATTCATGGGGAGGGGGAAGATTGTG      |
| m27a-R | CGGATCCTCATGGATTCAACTGTAACCCTAGC  |
| m57-F  | GGAATTCATGGGGAGGGGGAAGATAGTGATA   |
| m57-R  | CGGATCCTTAAGGCAGATGAAGTCCCAGTTCTG |

**pLACZi2u**

|          |                            |
|----------|----------------------------|
| pRDR1-F1 | GGAATTCTATCTTGCTACTTCCTCCG |
| pRDR1-R1 | GGGTACCTGATGCAATAGGCAATGGC |

**EMSA**

**MADS-GST**

|              |                              |
|--------------|------------------------------|
| M23-BamHI-F  | GGATCCTAATGGGGAGAGGGAAGATAG  |
| M23-EcoRI-R  | GAATTCGCAGTGGTAACAACCTTCCTGC |
| M27a-BamHI-F | GGATCCTAATGGGGAGGGGGAAGATTGT |
| M27a-EcoRI-R | GAATTCGCTGGATTCAACTGTAACCCTA |
| M57-BamHI-F  | GGATCCTAATGGGGAGGGGGAAGATAG  |
| M57-EcoRI-R  | GAATTCGCAGGCAGATGAAGTCCCAG   |

**Biotin-labeled probe**

|          |                                |
|----------|--------------------------------|
| RDR1-F1  | GTGCTAGAAATAGCTATATTTTGGGACGGA |
| RDR1-R1  | TCCGTCCCAAATATAGCTATTTCTAGCAC  |
| RDR1-mF1 | GTGCTAGAAATAGAAAAAAAAAAGGACGGA |
| RDR1-mR1 | TCCGTCTTTTTTTTTTCTATTTCTAGCAC  |

**Subculler localization**

|              |                                |
|--------------|--------------------------------|
| m27a-XbaI-F  | GCTCTAGAATGGGGAGGGGAAGATTGT    |
| m27a-BamHI-R | CGGGATCCGCTGGATTCAACTGTAACCCTA |
| m23-XbaI-F   | GCTCTAGAATGGGGAGAGGGGAAGATAG   |
| m23-BamHI-R  | CGGGATCCGCAGTGGTAACAACCTTCCTGC |
| m57-XbaI-F   | GCTCTAGAATGGGGAGGGGAAGATAG     |
| m57-BamHI-R  | CGGGATCCGCAGGCAGATGAAGTCCCAG   |

#### **BiFC**

|                   |                                                |
|-------------------|------------------------------------------------|
| ne-ce M23-XbaI-F  | GGAGAGAACACGGGGGACTCTAGAATGGGGAGAGGGGAAGATAGA  |
| ne-ce M27a-XbaI-F | GGAGAGAACACGGGGGACTCTAGAATGGGGAGGGGAAGATTGT    |
| ne-ce M57-XbaI-F  | GGAGAGAACACGGGGGACTCTAGAATGGGGAGGGGAAGATAG     |
| ne M23-KpnI-R     | GTAGTCCATCCCGGAGCGGTACCAGTGGTAACAACCTTCCTGC    |
| ce-M23-KpnI-R     | TGGGTACATCCCGGAGCGGTACCAGTGGTAACAACCTTCCTGC    |
| ne M27a-KpnI-R    | GTAGTCCATCCCGGAGCGGTACCAGTGGATTCAACTGTAACCCTAG |
| ce-M27a-KpnI-R    | TGGGTACATCCCGGAGCGGTACCAGTGGATTCAACTGTAACCCTAG |
| ne M57-KpnI-R     | GTAGTCCATCCCGGAGCGGTACCAGGCAGATGAAGTCCCAGTT    |
| ce-M57-KpnI-R     | TGGGTACATCCCGGAGCGGTACCAGGCAGATGAAGTCCCAGTT    |

#### **Transient expression in *Nicotiana Benthamiana***

##### **35S:MADS**

|               |                                            |
|---------------|--------------------------------------------|
| M23-BamHI-F   | GAACACGGGGGACTCTAGAG ATGGGGAGAGGGGAAGATAGA |
| M23-SacI-R    | CGATCGGGGAAATTCGAGCT CTAAGTGGTAACAACCTTCC  |
| M27a-BamHI-Fw | GAACACGGGGGACTCTAGAG ATGGGGAGGGGAAGATTGTG  |
| M27a-SacI-R   | CGATCGGGGAAATTCGAGCT CTAAGTGGTAACAACCTTCC  |
| M57-BamHI-F   | GAACACGGGGGACTCTAGAG ATGGGGAGGGGAAGATAGT   |
| M57- SacI-R   | CGATCGGGGAAATTCGAGCT TTAAGGCAGATGAAGTCCCA  |

##### **Promoter: GUS**

|                  |                               |
|------------------|-------------------------------|
| pRDR1-HindIII-F  | CAAGCTTTTCGGTTCTTGGGCTGATCATC |
| pRDR1-XbaI-R     | CTCTAGAGCGCGACGGTAGTGAGCAGAG  |
| mpRDR1-HindIII-F | CAAGCTTCCATGTGCATTTCTATATTCCG |

##### **miR444-resistant constructs**

|            |                                                        |
|------------|--------------------------------------------------------|
| M23-MR-Fw  | GCCGCCTCCCTCCGCCAACAGCTCCATAACTTGCAAGAATATCATC         |
| M23-MR-Rv  | TGGAGCTGTTGGCGGAGGGAGGCGGCCTCCTGTTGCCAAAGCTTTG         |
| M27a-MR-Fw | AGCCGCCTCCCTCCGCCAGCAGCTCCACAACCTTGCAAGAAAATCATCG      |
| M27a-MR-Rv | TGGAGCTGCTGGCGGAGGGAGGCGGCTTCCCTTTGCCAAAACCTTAAG       |
| M57-MR-Fw  | GCCGCCTCCCTCCGCCAACAGCTCCATAATCTCCAAGAAAGCCACAAGCAACTG |
| M57-MR-Rv  | AGATTATGGAGCTGTTGGCGGAGGGAGGCGGCCTCCCTCTGCCAAATCTTAA   |

##### **ChIP-PCR**

|    |                              |
|----|------------------------------|
| P1 | TTGGTTGAGAGGAGGAGGTAGGTGAAGA |
| P2 | ACGGAGGGAGTAGTCTGGTCTGTAAAT  |
| P3 | GCCGATGTGCCCTAATTAACCAAAGCTA |
| P4 | TGGCAAAAACAAAACAACGTGAAC     |

##### **Small RNA gel blot probes**

|        |                       |
|--------|-----------------------|
| miR444 | AAGCTTGAGGCAGCAACTGCA |
| miR528 | CTCCTCTGCATGCCCTTCCA  |
